# Supplementary material for: Highly Flexibility, Powder Self-Healing, and Recyclable Natural Polymer Hydrogels
Source: MDPI journal article supplement (doi:10.3390/gels8020089), 2022-01-31
Supplement: s1 [file s1]

Supplementary

# Highly Flexibility, Powder Self-Healing, and Recyclable Natural Polymer Hydrogels

Haiyue Miao <sup>1,2,†</sup>, Weiju Hao <sup>1,†</sup>, Hongtao Liu <sup>2</sup>, Yiyang Liu <sup>2</sup>, Xiaobin Fu <sup>2,\*</sup>, Hailong Huang <sup>2,\*</sup>, Min Ge <sup>2</sup> and Yuan Qian <sup>2,\*</sup>

<sup>1</sup> School of Materials and Chemistry, University of Shanghai for Science and Technology, No. 516 Jungong Road, Shanghai 200093, China; miaohaiyue@sinap.ac.cn (H.M.); wjhao@usst.edu.cn (W.H.)

<sup>2</sup> Key Laboratory of Interfacial Physics and Technology and Department of Molten Salt Chemistry and Engineering, Shanghai Institute of Applied Physics, Chinese Academy of Sciences, Shanghai 201800, China; liuhongtao@sinap.ac.cn (H.L.); liuyiyang@sinap.ac.cn (Y.L.); gemin@sinap.ac.cn (M.G.)

\* Correspondence: fuxiaobin@sinap.ac.cn (X.F.); huanghailong@sinap.ac.cn (H.H.); qianyuan@sinap.ac.cn (Y.Q.)

† These two authors contributed equally to this work.

**Table S1.** Different contents of CMA hydrogels.

| Sample | CS (g) | MA (g) | APS (g) | Heating Time (h) |
|--------|--------|--------|---------|------------------|
| CMA-1  | 4.0    | 1.0    | 0.05    | 6.0              |
| CMA-2  | 4.0    | 2.0    | 0.05    | 6.0              |
| CMA-3  | 4.0    | 3.0    | 0.05    | 6.0              |

**Table S2.** Mechanical properties of CMA hydrogels.

| Sample | Tensile strain | Stress   | Young modulus | Toughness              |
|--------|----------------|----------|---------------|------------------------|
| CMA-1  | 1357%          | 26 k·Pa  | 20.3 k·Pa     | 0.18 MJ/m <sup>3</sup> |
| CMA-2  | 1718%          | 62 k·Pa  | 78.5 k·Pa     | 0.76 MJ/m <sup>3</sup> |
| CMA-3  | 3012%          | 125 k·Pa | 129.4 k·Pa    | 2.14 MJ/m <sup>3</sup> |

**Citation:** Miao, H.; Hao, W.; Liu, H.; Liu, Y.; Fu, X.; Huang, H.; Ge, M.; Qian, Y. Highly Flexibility, Powder Self-Healing, and Recyclable Natural Polymer Hydrogels. *Gels* **2022**, *8*, 89. <https://doi.org/10.3390/gels8020089>

Academic Editor: David Mills

Received: 4 December 2021

Accepted: 12 January 2022

Published: 31 January 2022

**Publisher's Note:** MDPI stays neutral with regard to jurisdictional claims in published maps and institutional affiliations.

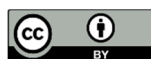

**Copyright:** © 2022 by the authors. Licensee MDPI, Basel, Switzerland. This article is an open access article distributed under the terms and conditions of the Creative Commons Attribution (CC BY) license (<https://creativecommons.org/licenses/by/4.0/>).

**Table S3.** Comparisons of self-healing ability of CMA-3 hydrogel with previous reported self-healing hydrogel in the literature.

| Sample                                        | Tensile strain | Self-healing time/rate | Dryness | Partial of hydrogel missing | Recyclability | Ref.      |
|-----------------------------------------------|----------------|------------------------|---------|-----------------------------|---------------|-----------|
| PPBN                                          | 991%           | 6.0 h/90%              | x       | x                           | x             | [1]       |
| IPN                                           | 1400%          | 24.0 h/80%             | √       | x                           | x             | [2]       |
| PVA/PEGDA/Agar/H <sub>2</sub> SO <sub>4</sub> | 431%           | 24.0 h/52.4%           | x       | x                           | x             | [3]       |
| BH-5.5-1.5-0.4                                | 645%           | 24.0 h/90%             | x       | x                           | x             | [4]       |
| JGNs/PAA                                      | 508.5%         | 1.0 h/93.4%            | x       | x                           | x             | [5]       |
| CNCs@P4VP                                     | 921.6%         | 6.0 h/85.9%            | x       | x                           | x             | [6]       |
| PAA-CMC-Al <sup>3+</sup>                      | 2066%          | 1.0 h/96.3%            | x       | x                           | x             | [7]       |
| TOCNF-GN/PAA                                  | 850%           | 12.0 h/96.7%           | x       | x                           | x             | [8]       |
| CMA                                           | 3020%          | 5 min/92.9%            | √       | √                           | √             | This work |

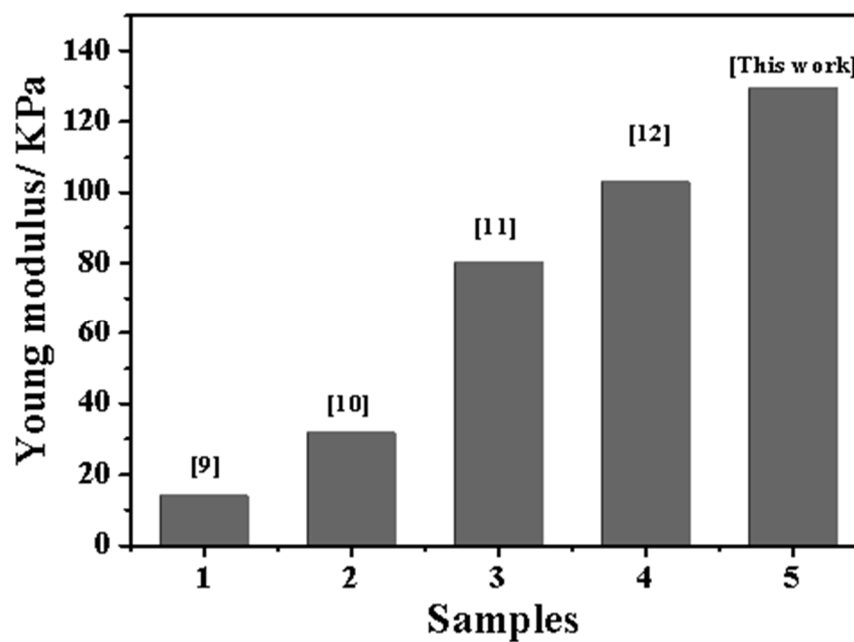**Figure S1.** Comparisons of Young modulus of CMA-3 hydrogel with previous reported self-healing hydrogel in the literature.

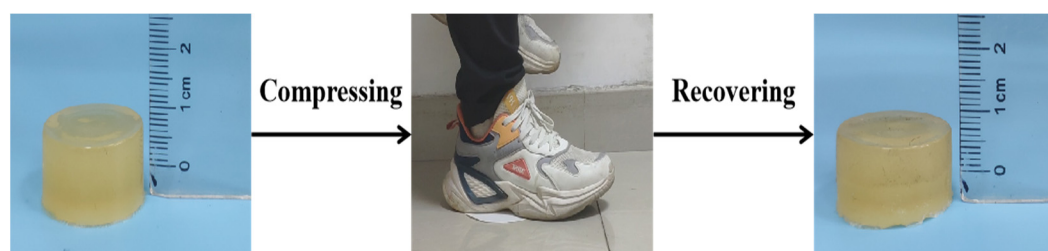

Figure S2. Compressing-recovering process of CMA-3 hydrogel.

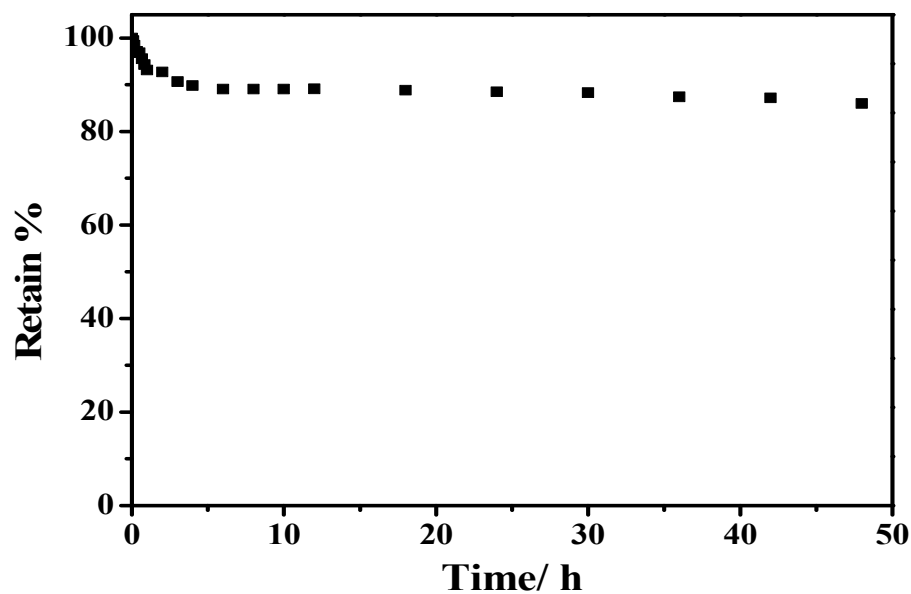

Figure S3. Water retaining ability of CMA-3 hydrogel.

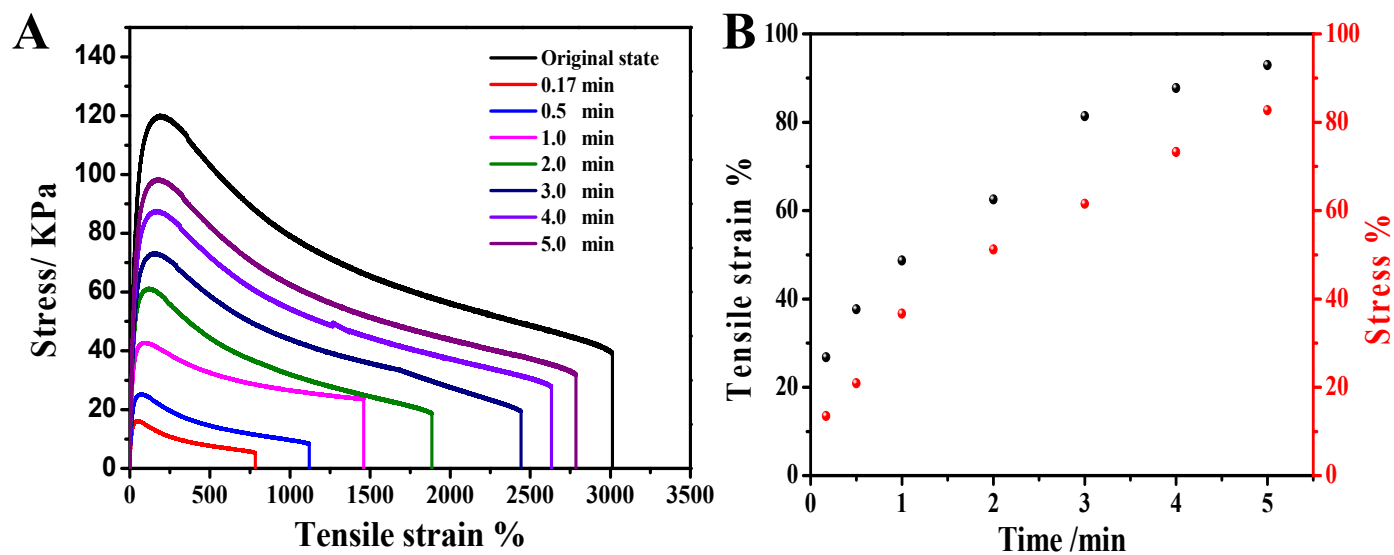

Figure S4. Tensile stress–strain curves of CMA-3 hydrogel during the self-healing process at different healing time (A,B).

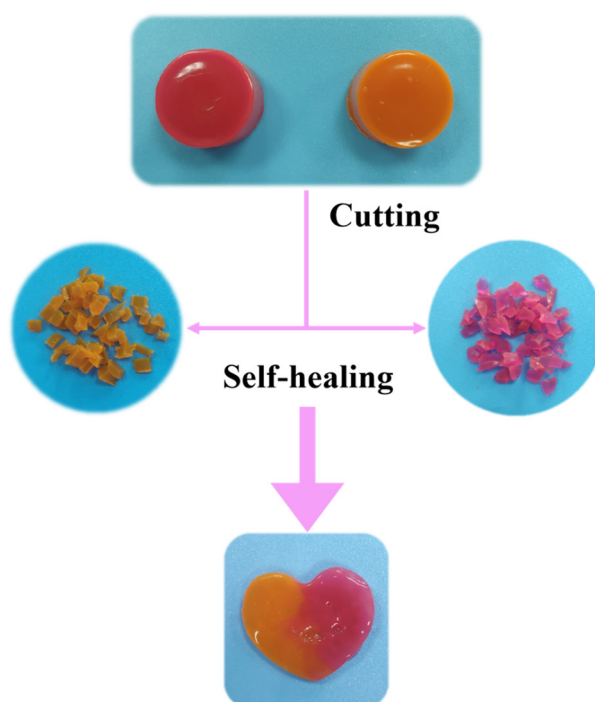

**Figure S5.** Photographs of self-healing ability of CMA-3 hydrogel.

## Reference

- Ge, G.; Lu, Y.; Qu, X.; Zhao, W.; Ren, Y.; Wang, W.; Wang, Q.; Huang, W.; Dong, X. Muscle-Inspired Self-Healing Hydrogels for Strain and Temperature Sensor. *ACS Nano* **2020**, *14*, 218–228.
- Shin, S.-H.; Lee, W.; Kim, S.; Lee, M.; Koo, J.M.; Hwang, S.Y.; Oh, D.X.; Park, J. Ion-conductive self-healing hydrogels based on an interpenetrating polymer network for a multimodal sensor. *Chem. Eng. J.* **2019**, *371*, 452–460.
- Chang, S.; Wang, B.; Liu, Y.; Li, Z.; Hu, X.; Zhang, X.; Zhang, H. Radiation-assistant preparation of highly conductive, transparent and self-healing hydrogels with triple-network structure. *Polymer* **2020**, *188*, 122156.
- Ji, F.; Li, J.; Zhang, G.; Lan, W.; Sun, R.; Wong, C.P. Alkaline monomer for mechanical enhanced and self-healing hydrogels based on dynamic borate ester bonds. *Polymer* **2019**, *184*, 121882.
- Ma, A.; Wang, G.; Yang, Z.; Bai, L.; Chen, H.; Wang, W.; Yang, H.; Wei, D.; Yang, L. Fabrication of Janus graphene oxide hybrid nanosheets by Pickering emulsion template for self-healing nanocomposite hydrogels. *Chem. Eng. J.* **2020**, *385*, 123962.
- Bai, L.; Jiang, X.; Sun, Z.; Pei, Z.; Ma, A.; Wang, W.; Chen, H.; Yang, H.; Yang, L.; Wei, D. Self-healing nanocomposite hydrogels based on modified cellulose nanocrystals by surface-initiated photoinduced electron transfer ATRP. *Cellulose* **2019**, *26*, 5305–5319.
- Pang, J.; Wang, L.; Xu, Y.; Wu, M.; Wang, M.; Liu, Y.; Yu, S.; Li, L. Skin-inspired cellulose conductive hydrogels with integrated self-healing, strain, and thermal sensitive performance. *Carbohydr. Polym.* **2020**, *240*, 116360.
- Zheng, C.; Lu, K.; Lu, Y.; Zhu, S.; Yue, Y.; Xu, X.; Mei, C.; Xiao, H.; Wu, Q.; Han, J. A stretchable, self-healing conductive hydrogels based on nanocellulose supported graphene towards wearable monitoring of human motion. *Carbohydr. Polym.* **2020**, *250*, 116905.
- Maryam, T.; Ali, P.; Maryam, A.; Hamid, T.; Seyyed, J.S.T.; Monireh, A.; Navid, R.; Mojtaba, B.; Rajender, S.V. An environmentally friendly wound dressing based on a self-healing, extensible and compressible antibacterial hydrogel. *Green Chem.* **2021**, *23*, 1312–1329.
- He, X.L.; Sun, X.Q.; Meng, H.Y.; Deng, S.Y.; He, T.T.; Zang, H.J.; Wei, D.S., Self-healing polymeric ionic liquid hydrogels with high mechanical strength and ionic conductivity. *J. Mater. Sci.* **2021**, *56*, 1023.
- Li, Y.Y.; Zhou, T.Y.; Yu, Z.Y.; Wang, F.; Shi, D.J.; Ni, Z.B.; Chen, M.Q., Effects of surfactant and ionic concentration on properties of dual physical crosslinking self-healing hydrogels by hydrophobic association and ionic interactions. *New J. Chem.* **2020**, *44*, 4061–4070.
- Ye, L.; Lv, Q.; Sun, X.Y.; Liang, Y.Z.; Fang, P.W.; Yuan, X.Y.; Li, M.; Zhang, X.Z.; Shang, X.F.; Liang, H.Y., Fully physically cross-linked double network hydrogels with strong mechanical properties, good recovery and self-healing properties. *Soft Matter* **2020**, *16*, 1840–1849.
